# Supplementary material for: Haloarchaeal poly[(3-hydroxybutyrate)-co-(3-hydroxyvalerate)] composite films reinforced with graphene nanoplatelets as a biomaterial for skin tissue engineering
Source: Royal Society of Chemistry journal article supplement (doi:10.1039/d4ra00713a), 2024-01-01
Supplement: d4ra00713a1.pdf [file d4ra00713a1.pdf]

**Haloarchaeal poly poly[(3-hydroxybutyrate)-co-(3-hydroxyvalerate)] composite films reinforced with graphene nanoplatelets as a biomaterial for skin tissue engineering.**

Prajakta Praveen Bhende<sup>a</sup>, Joephil D. Dias<sup>a</sup>, Honey Srivastava<sup>b</sup>, Rashmi Chauhan<sup>b</sup>, Sachin Waigaonkar<sup>c</sup>, Anasuya Ganguly<sup>a</sup> and Judith M. Bragança<sup>a\*</sup>

**Supplementary data:**

**S1**

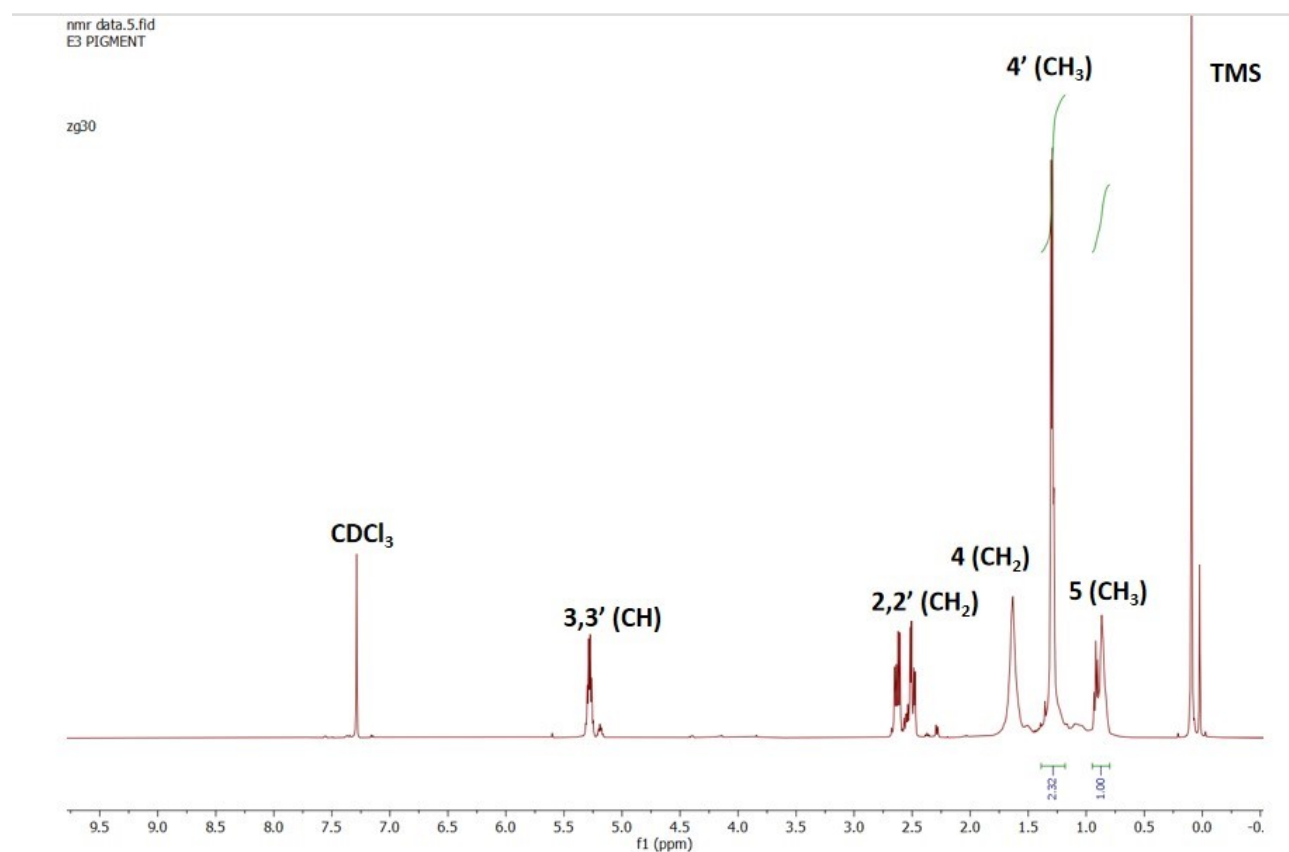

S1 - <sup>1</sup>H NMR of *Hgm. borinquense* E3 derived PHBV polymer

$$\text{HV COMPOSITION (\%)} = \frac{\text{Area of CH}_3 \text{ (HV)}}{[\text{Area of CH}_3 \text{ (HV)} + \text{Area of CH}_3 \text{ (HB)}]} \times 100$$

HV area = 1.00

HB area = 2.32

therefore  $1/1+2.32 = 1/3.32$

Therefore % HV is 30%

S2

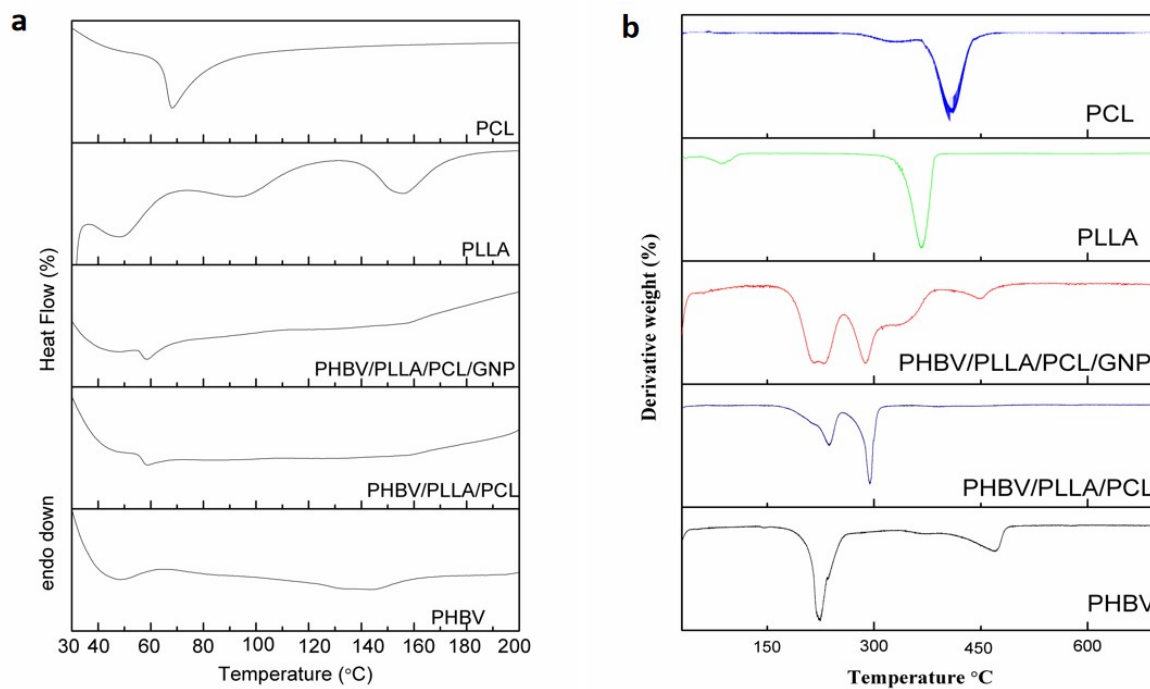

c

| Temperature | PHBV | PHBV/PLLA/PCL | PHBV/PLLA/PCL / GNP | PLLA | PCL |
|-------------|------|---------------|---------------------|------|-----|
| 250°C-200°C | 11%  | 9%            | 9%                  | 13%  | 1%  |
| 200°C-350°C | 42%  | 60%           | 37%                 | 17%  | 13% |
| 350°C-500°C | 23%  | 5%            | 9%                  | 66%  | 84% |
| 500°C-700°C | 21%  | 1%            | 2%                  | 1%   | 1%  |
| Residue     | 22%  | 25%           | 43%                 | 3%   | 1%  |

S2- a) DSC b) DTG and c) weight loss of *Hgm. borinquense* E3 derived PHBV, PHBV/PLLA/PCL, PHBV/PLLA/PCL/GNP, PLLA and PCL.

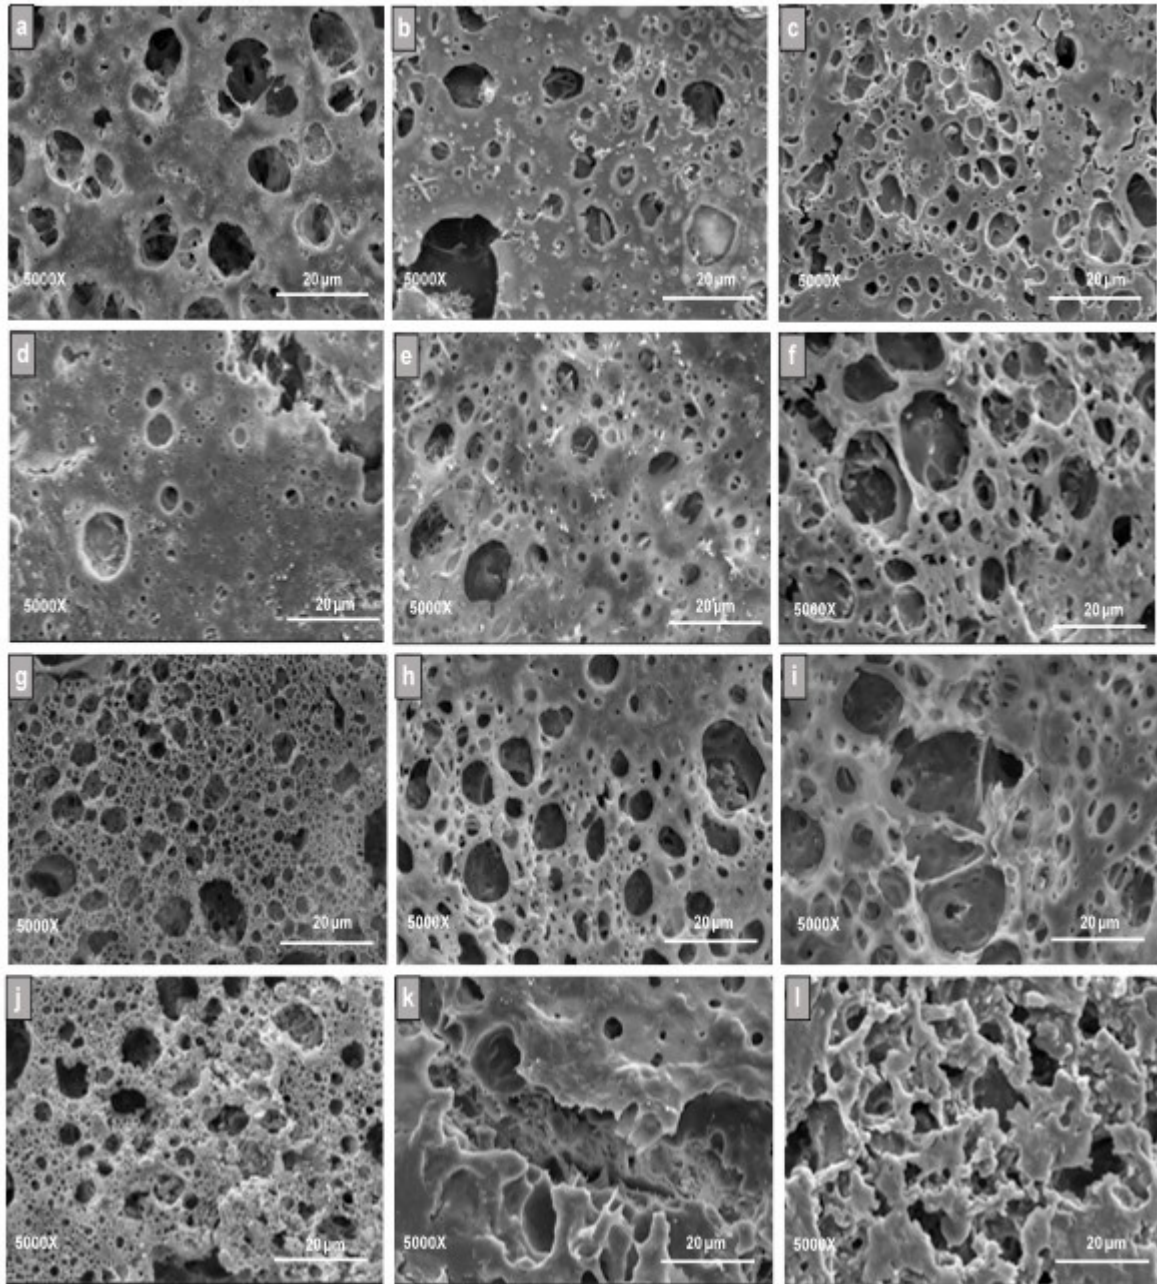

S3- Ultrastructure of the haloarchaeal PHBV and its composites exposed to the action of lysozyme for a particular time point. Panels a, b, and c depict the *in vitro* degradation of the *Hgm. borinquense* E3 derived PHBV, PHBV/PLLA/PCL and the PHBV/PLLA/PCL/GNP films respectively after 7 days. Panels d, e, and f represent the haloarchaeal PHBV, PHBV/PLLA/PCL, and PHBV/GNP films after 14 days of degradation. Wider pores can be seen in the films. Panels g, h, and i show the 21-day degradation of the haloarchaeal PHBV, PHBV/PLLA/PCL, and PHBV/GNP film. At the end of 28 days, the *Hgm. borinquense* E3 film is observed to be highly porous (shown in panel j). The PHBV/PLLA/PCL film (panel k) and the PHBV/PLLA/PCL/GNP film (panel l) also show deep cracks on the surface indicating a gradual loss of structural integrity of the films.
